# Supplementary material for: Drug-target networks in aminoglycoside resistance: hierarchy of priority in structural drug design
Source: Royal Society of Chemistry journal article supplement (doi:10.1039/c5md00384a), 2015-12-10
Supplement: c5md00384a1.pdf [file c5md00384a1.pdf]

Electronic Supplementary Information (ESI)

Table 1:

| Enzyme             | Aminoglycoside Substrate | Co-substrate                 | PDB code             |
|--------------------|--------------------------|------------------------------|----------------------|
| <b>AAC's</b>       |                          |                              |                      |
| AAC(2')-Ic         | None                     | None                         | <a href="#">1M44</a> |
| AAC(2')-Ic         | Tobramycin               | Coenzyme-A                   | <a href="#">1M4D</a> |
| AAC(2')-Ic         | Ribostamycin             | Coenzyme-A                   | <a href="#">1M4G</a> |
| AAC(2')-Ic         | Kanamycin                | Coenzyme-A                   | <a href="#">1M4I</a> |
| AAC(6')-Ib         | None                     | None                         | <a href="#">2PR8</a> |
| AAC(6')-Ib         | None                     | Coenzyme-A                   | <a href="#">2PRB</a> |
| AAC(6')-Ib         | Kanamycin                | Coenzyme-A                   | <a href="#">2QIR</a> |
| AAC(6')-Ib         | Ribostamycin             | Coenzyme-A                   | <a href="#">2BUE</a> |
| AAC(6')-Ib         | Paromomycin              | Coenzyme-A                   | <a href="#">2VQY</a> |
| AAC(6')-Ie         | Kanamycin                | Coenzyme-A                   | <a href="#">4QC6</a> |
| AAC(6')-Ig         | None                     | None                         | <a href="#">4FOY</a> |
| AAC(6')-Ig         | Tobramycin               | None                         | <a href="#">4EVY</a> |
| AAC(6')-Ih         | None                     | None                         | <a href="#">4E8O</a> |
| AAC(6')-Ii         | None                     | Coenzyme-A                   | <a href="#">1N71</a> |
| AAC(6')-Ii         | None                     | Acetyl Coenzyme-A            | <a href="#">1B87</a> |
| AAC(6')-Iy         | Ribostamycin             | Coenzyme-A                   | <a href="#">1S3Z</a> |
| AAC(6')-Iy         | None                     | Bisubstrate                  | <a href="#">2VBQ</a> |
| AAC(6')-Iy         | None                     | None                         | <a href="#">1S5K</a> |
| AAC(3)-Ib          | None                     | None                         | <a href="#">4YFJ</a> |
| AAC(3)-Ia          | None                     | Coenzyme-A                   | <a href="#">1BO4</a> |
| <b>APH's</b>       |                          |                              |                      |
| APH(4)-Ia          | Hygromycin B             | None                         | <a href="#">3TYK</a> |
| APH(4)-Ia (mutant) | None                     | None                         | <a href="#">3W0M</a> |
| APH(4)-Ia          | Hygromycin B             | AMPPNP                       | <a href="#">3WOS</a> |
| APH(4)-Ia (mutant) | Hygromycin B             | AMPPNP                       | <a href="#">3W0N</a> |
| APH(4)-Ia (mutant) | Hygromycin B             | AMPPNP                       | <a href="#">3W0Q</a> |
| APH(4)-Ia (mutant) | Hygromycin B             | AMPPNP                       | <a href="#">3W0R</a> |
| APH(4)-Ia (mutant) | Hygromycin B             | ADP                          | <a href="#">3W0O</a> |
| APH(4)-Ia (mutant) | Hygromycin B             | ADP                          | <a href="#">3W0P</a> |
| APH(9)-Ia          | None                     | None                         | <a href="#">3I1A</a> |
| APH(9)-Ia          | Spectinomycin            | ADP                          | <a href="#">3I0Q</a> |
| APH(9)-Ia          | None                     | AMP                          | <a href="#">3I0Q</a> |
| APH(9)-Ia          | None                     | CKI-7 (inhibitor)            | <a href="#">3Q2M</a> |
| APH(3')-Ia         | None                     | ATP                          | <a href="#">4EJ7</a> |
| APH(3')-Ia         | Kanamycin                | Anthrapyrazolone (inhibitor) | <a href="#">4FEU</a> |
| APH(3')-Ia         | Kanamycin                | PP1 (inhibitor)              | <a href="#">4FEV</a> |

|                        |                |                        |                      |
|------------------------|----------------|------------------------|----------------------|
| APH(3')-Ia             | Kanamycin      | PP2 (inhibitor)        | <a href="#">4FEW</a> |
| APH(3')-Ia             | Kanamycin      | Tyrphostin (inhibitor) | <a href="#">4FEX</a> |
| APH(3')-Ia             | Kanamycin      | 1-NA-PP1 (inhibitor)   | <a href="#">4GKH</a> |
| APH(3')-Ia             | Kanamycin      | 1-NM-PP1 (inhibitor)   | <a href="#">4GKI</a> |
| APH(3')-IIa            | Kanamycin      | None                   | <a href="#">1ND4</a> |
| APH(3')-IIIa           | None           | None                   | <a href="#">1J7I</a> |
| APH(3')-IIIa           | None           | ADP                    | <a href="#">1J7L</a> |
| APH(3')-IIIa           | None           | AMPPNP                 | <a href="#">1J7U</a> |
| APH(3')-IIIa           | Kanamycin      | ADP                    | <a href="#">1L8T</a> |
| APH(3')-IIIa           | None           | ADP                    | <a href="#">2BKK</a> |
| APH(3')-IIIa           | None           | CKI-7 (inhibitor)      | <a href="#">3Q2J</a> |
| APH(3')-IIIa           | Neomycin B     | ADP                    | <a href="#">2B0Q</a> |
| APH(3')-IIIa           | Butirosin A    | AMPPNP                 | <a href="#">3TMO</a> |
| APH(3')-VIII           | None           | None                   | <a href="#">4H05</a> |
| APH(2'')-Ia            | None           | GDP                    | <a href="#">4ORK</a> |
| APH(2'')-Ia            | Kanamycin      | GMPPNP                 | (to be published)    |
| APH(2'')-Ia            | Gentamicin C1  | GMPPNP                 | (to be published)    |
| APH(2'')-Ib            | None           | None                   | <a href="#">3UZR</a> |
| APH(2'')-Ib            | None           | ADP                    | <a href="#">4DCA</a> |
| APH(2'')-IIa           | Gentamicin C1a | None                   | <a href="#">3HAM</a> |
| APH(2'')-IIa           | Streptomycin   | ATP                    | <a href="#">3HAV</a> |
| APH(2'')-IIIa (mutant) | None           | GDP                    | <a href="#">3TDW</a> |
| APH(2'')-IIIa          | None           | GDP                    | <a href="#">3TDV</a> |
| APH(2'')-Iva           | None           | ADP                    | <a href="#">4N57</a> |
| APH(2'')-Iva           | None           | Adenosine              | <a href="#">4DT8</a> |
| APH(2'')-Iva           | None           | Guanosine              | <a href="#">4DT9</a> |
| APH(2'')-Iva (mutant)  | None           | Adenosine              | <a href="#">4DTA</a> |
| APH(2'')-Iva (mutant)  | None           | Guanosine              | <a href="#">4DTB</a> |
| APH(2'')-Iva           | None           | None                   | <a href="#">3N4T</a> |
| APH(2'')-Iva           | Kanamycin      | None                   | <a href="#">3SG9</a> |
| APH(2'')-Iva           | Tobramycin     | None                   | <a href="#">3SG8</a> |
| APH(2'')-Iva           | Kanamycin      | Quercetin (inhibitor)  | <a href="#">4DFU</a> |
| <b>ANT's</b>           |                |                        |                      |
| ANT(6)-Ia              | None           | None                   | <a href="#">2PBE</a> |
| ANT(4')-Ia             | None           | None                   | <a href="#">1KAN</a> |
| ANT(4')-Ia             | Kanamycin      | AMPCPP                 | <a href="#">1KNY</a> |
| ANT(4')-IIb            | None           | None                   | <a href="#">4EBJ</a> |
| ANT(4')-IIb            | Tobramycin     | None                   | <a href="#">4EBK</a> |
| ANT(2'')-Ia            | None           | None                   | <a href="#">4WQK</a> |
| ANT(2'')-Ia            | Kanamycin      | None                   | <a href="#">4WQL</a> |
| ANT(2'')-Ia            | Tobramycin     | AMP                    | <a href="#">4XJE</a> |
| ANT(2'')-Ia            | Tobramycin     | AMPCPP                 | <a href="#">5CFS</a> |

|                           |                |                         |                      |
|---------------------------|----------------|-------------------------|----------------------|
| ANT(2'')-Ia               | Gentamicin C1  | AMPCPP                  | <a href="#">5CFT</a> |
| ANT(2'')-Ia               | None           | 2''-adenylyl-tobramycin | <a href="#">5CFU</a> |
| ANT(3'')-Ia               | None           | None                    | <a href="#">4CS6</a> |
| <b>Bacterial Ribosome</b> |                |                         |                      |
| 16S-rRNA A-site           | Lividomycin    | N/A                     | <a href="#">2ESJ</a> |
| 16S-rRNA A-site           | Neomycin A     | N/A                     | <a href="#">2ET8</a> |
| 16S-rRNA A-site           | Neomycin B     | N/A                     | <a href="#">2ET4</a> |
| 16S-rRNA A-site           | Paromomycin    | N/A                     | <a href="#">1J7T</a> |
| 16S-rRNA A-site           | Kanamycin      | N/A                     | <a href="#">2ESI</a> |
| 16S-rRNA A-site           | Amikacin       | N/A                     | <a href="#">4P20</a> |
| 16S-rRNA A-site           | Tobramycin     | N/A                     | <a href="#">1LC4</a> |
| 16S-rRNA A-site           | Gentamicin C1a | N/A                     | <a href="#">2ET3</a> |
| 16S-rRNA A-site           | Sisomicin      | N/A                     | <a href="#">4F8U</a> |
| 30S ribosomal subunit     | Hygromycin     | N/A                     | <a href="#">1HNZ</a> |
| 30S ribosomal subunit     | Streptomycin   | N/A                     | <a href="#">4DR3</a> |
| Bacterial ribosome        | Spectinomycin  | N/A                     | <a href="#">4V56</a> |
